# Supplementary material
Source: MDPI journal article supplement (https://www.mdpi.com/2504-3129/4/2/12)
Supplement: s1 [file s1]

## Supplementary Materials

### Biodiversity-Based Empirical Critical Loads of Nitrogen Deposition in the Athabasca Oil Sands Region

Nicole Vandinther and Julian Aherne \*

School of Environment, Trent University, Peterborough, Ontario, Canada K9L 0G2

\*Correspondance: jaherne@trentu.ca

### SUPPLEMENTARY MATERIALS SI. Vegetation plot configurations and survey information

**Supplementary Materials SI – i.** SK-FEC survey: Vegetation information was collected across a 10 m × 10 m square plot and reported as average percent cover by layer.

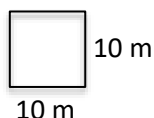

**Supplementary Materials SI – ii.** WBEA survey: Understorey vegetation information added in 2004. Large plots measuring 10 m × 40 m were established at each site. Vegetation information was collected across 10 small subplots (seen in Figure legend), 2 medium subplots (seen in Figure legend) and 1 large subplot in the centre, all within the large plot. Vegetation information was collected using the Daubenmire method of cover class estimation and reported as species composition percent.

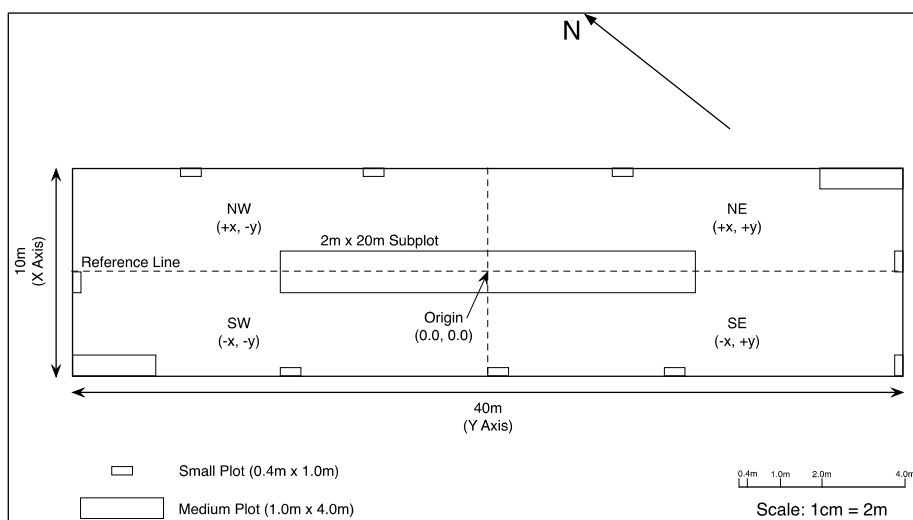

Source: Clair, T. A. and K. E. Percy (Editors) 2015. Assessing forest health in the Athabasca Oil Sands Region. *WBEA Technical Report*. 2015-05-25, 180 pp +Appendices.

**Supplementary Materials SI – iii. Daubenmire Cover class estimation method**  
**Daubenmire Cover Classes**

| Cover Class | Canopy Coverage | Midpoint of Range |
|-------------|-----------------|-------------------|
| 1           | 0 to 5%         | 2.5%              |
| 2           | 6 to 25%        | 15.0%             |
| 3           | 26 to 50%       | 37.5%             |
| 4           | 51 to 75%       | 62.5%             |
| 5           | 76 to 95%       | 85.0%             |
| 6           | 96 to 100%      | 97.5%             |

**Supplementary Materials SI – iv. Vegetation sampling plot configuration used in the NFI survey.** Vegetation information was collected across a 10 m × 10 m ecological plot at the centre of the site (seen by the square) and reported as percent cover by layer.

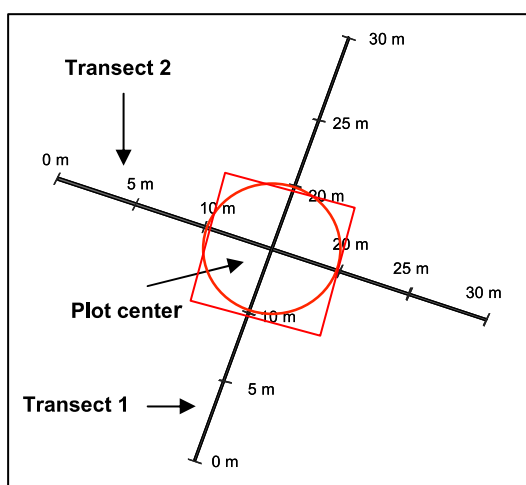

Source: Canadian Forest Inventory Committee (CFIC). (2008). Canada's National Forest Inventory: Ground Sampling Guidelines. *Natural Resources Canada*, Canadian Forest Service, Pacific Forestry Centre, Victoria, British Columbia. ISBN: 978-1-100-11330-2

**Supplementary Materials SI – v. Vegetation sampling plot configuration used the NWT-FEC survey.** Sampling began with a 20 m × 20 m plot where site characteristics and tree species and percent cover were recorded. Plot shapes were either rectangular (10 m × 40 m), square (20 m × 20 m) or circular (with radius of 11.3 m<sup>2</sup>) to reduce topographic variability. Within each plot, smaller subplots (in red) were established to record shrub, herb, grass, moss and lichen species. Subplot shapes were either square (10 m × 10 m) or circular (radius of 5.6 m<sup>2</sup>) depending on the site topography and vegetation information was reported as percent cover.

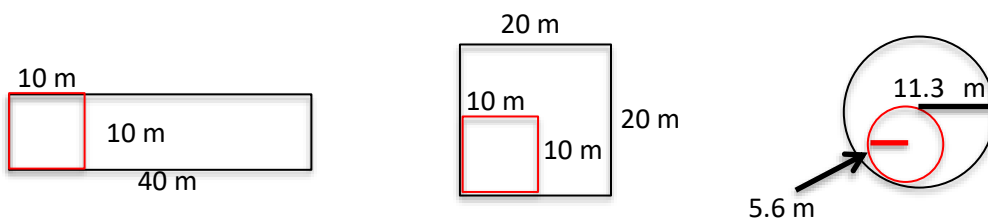

## SUPPLEMENTARY MATERIALS SII. GradientForest Information

Supplementary Materials SII – i. Random forest and extended forest components, description and component use.

| RANDOM FOREST & EXTENDED FOREST FUNCTION |                                                                                                                                                                        |                                                                                                              |                                                                                  |                                                                |
|------------------------------------------|------------------------------------------------------------------------------------------------------------------------------------------------------------------------|--------------------------------------------------------------------------------------------------------------|----------------------------------------------------------------------------------|----------------------------------------------------------------|
| Component                                | Goodness-of-fit values/Predictive Performance $\rightarrow R^2_s$                                                                                                      | Accuracy Importance Values                                                                                   | Raw Importance Values                                                            | Density of splits                                              |
| Description                              | $R^2_s$ values given for a forest of any given species                                                                                                                 | Values are given for each predictor; determines how important a variable is for the model (predictive power) |                                                                                  | Obtained in randomForest through Kernel density of estimations |
| Component Use                            | GradientForest: used in multiple plots; $R^2_s$ values are partitioned into contributions ( $R^2_{sp}$ ) from each predictor in proportion to the predictor importance | GradientForest: used in Conditional Importance Plot                                                          | GradientForest: used in Cumulative importance plots (both species and community) | GradientForest: used in densities plot                         |

**Supplementary Materials SII– ii. GradientForest outputs, components included, descriptions and additional information.**

| GRADIENT FOREST OUTPUT |                                                                                                                                                                                                                                                                  |                                                                                                                                                                                                                                                                                                                                                                                     |                                                                                                                                                                                                                                                                                                                                                                                                                                                                                             |                                                                                                                                                                                             |
|------------------------|------------------------------------------------------------------------------------------------------------------------------------------------------------------------------------------------------------------------------------------------------------------|-------------------------------------------------------------------------------------------------------------------------------------------------------------------------------------------------------------------------------------------------------------------------------------------------------------------------------------------------------------------------------------|---------------------------------------------------------------------------------------------------------------------------------------------------------------------------------------------------------------------------------------------------------------------------------------------------------------------------------------------------------------------------------------------------------------------------------------------------------------------------------------------|---------------------------------------------------------------------------------------------------------------------------------------------------------------------------------------------|
| Plot Type              | Overall Conditional Importance Plot                                                                                                                                                                                                                              | Densities Plot                                                                                                                                                                                                                                                                                                                                                                      | Cumulative Importance Plot (Species & Community)                                                                                                                                                                                                                                                                                                                                                                                                                                            | Overall Performance (Species) R <sup>2</sup> Plot                                                                                                                                           |
| Included Components    | <ul style="list-style-type: none"> <li>Overall R<sup>2</sup> weighted importance</li> <li>Accuracy importance</li> </ul>                                                                                                                                         | <ul style="list-style-type: none"> <li>Density of splits (black curve)</li> <li>Density of data (red curve)</li> <li>Ratio of densities (blue curve)</li> <li>Ratio = 1 (dashed blue curve)</li> <li>Binned Split Importance Values (grey bars)</li> </ul>                                                                                                                          | <ul style="list-style-type: none"> <li>Individual species turnover functions</li> <li>Community turnover functions</li> </ul>                                                                                                                                                                                                                                                                                                                                                               | <ul style="list-style-type: none"> <li>R<sup>2</sup><sub>SP</sub> values</li> </ul>                                                                                                         |
| Output Description     | Identifies the amount of variance in the model that is explained by each predictor and whether a predictor has predictive power                                                                                                                                  | Identifies regions across an environmental variable of higher importance for plant species compositional change                                                                                                                                                                                                                                                                     | Reveals Species associated with community thresholds                                                                                                                                                                                                                                                                                                                                                                                                                                        | Shows species distributed according to their specific R <sup>2</sup> value; Indication of how well a species was predicted by all environmental variables                                   |
| Additional Information | <ul style="list-style-type: none"> <li>R<sup>2</sup><sub>S</sub> are partitioned into contributions (R<sup>2</sup><sub>SP</sub>)</li> <li>Sum of all R<sup>2</sup><sub>SP</sub> = overall R<sup>2</sup> weighted importance (given to each predictor)</li> </ul> | <ul style="list-style-type: none"> <li>Ratio of densities = <math>\frac{\text{Density of splits}}{\text{Density of data}}</math></li> <li>Area under the Curve = R<sup>2</sup> weighted importance</li> <li>High peaks (where ratio &gt;1) represent thresholds</li> <li>Binned split importance represents both split locations and relative importance on the gradient</li> </ul> | <ul style="list-style-type: none"> <li>Species turnover function: distribute R<sup>2</sup><sub>S</sub> from all species among the predictors in proportion to the accuracy importance values and along the predictor gradients according to the density of raw importances</li> <li>Community turnover functions: Aggregate the normalized cumulative distribution, scale by R<sup>2</sup> weighted importance and standardize by density of data and average across all species</li> </ul> | <ul style="list-style-type: none"> <li>Overall Performance R<sup>2</sup> = Sum of all R<sup>2</sup><sub>SP</sub> values per species</li> <li>Output only shows positive response</li> </ul> |

\*The average of all overall R<sup>2</sup> weighted importance values = Mean R<sup>2</sup> weighted importance (how much of the overall model variation is explained by all predictors).

### SUPPLEMENTARY MATERIALS SIII.

**Supplementary Materials SIII – i.** Location of all 58 sites initially considered before the TDN gradient was used to reduce site to 46. Study sites are colour coded based on their survey of origin, with orange representing WBEA survey sites (n = 25), green representing NWT-FEC survey sites (n = 9) in green and blue representing SK-FEC survey sites (n = 24).

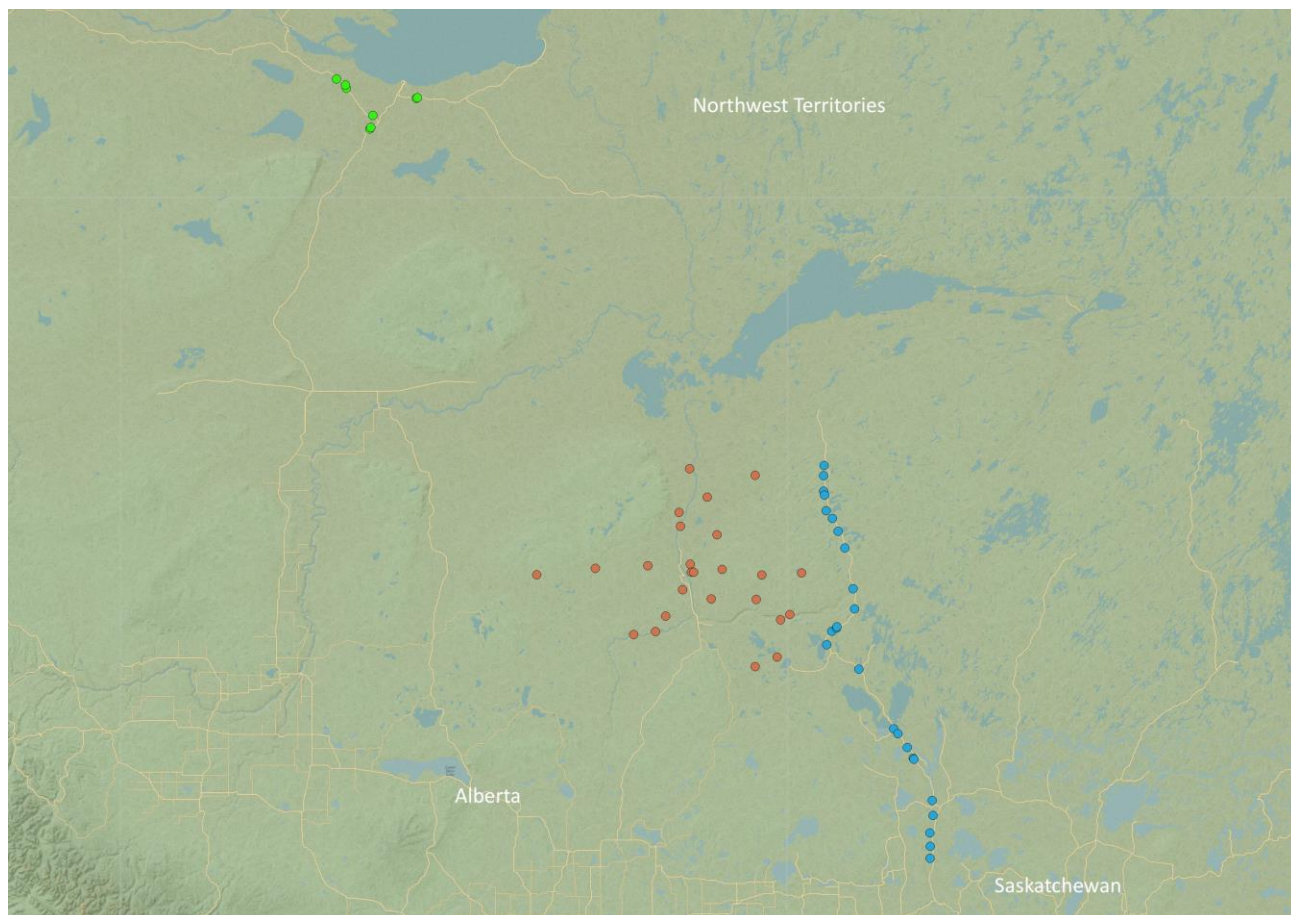

**Supplementary Materials SIII – ii.** List of all 11 nitrogen species, all 4 sulphur species, TDN and TDS and their associated summary statistics across all 46 study sites. Data source is Gem-Mach (Makar *et al.*, 2018).

Range denotes the minimum and maximum, respectively. Variables denoted by \* refer to variables that were selected for gradient forest analysis following variable reduction methods.

| CODE              | ENVIRONMENTAL VARIABLE<br>(eq ha <sup>-1</sup> yr <sup>-1</sup> ) | RANGE         | MEDIAN | MEAN   | STANDARD<br>DEVIATION |
|-------------------|-------------------------------------------------------------------|---------------|--------|--------|-----------------------|
| *TDN              | Total Deposited Nitrogen                                          | 37.21–597.01  | 136.70 | 176.45 | 131.60                |
| DHN <sub>3</sub>  | Dry Hydrazoic Acid                                                | 8.57–83.02    | 36.69  | 39.34  | 19.72                 |
| DNH <sub>3</sub>  | Dry Ammonia                                                       | 0.28–114.08   | 5.11   | 14.36  | 24.88                 |
| DNO <sub>2</sub>  | Dry Nitrogen Dioxide                                              | 2.74–309.59   | 17.02  | 47.43  | 70.21                 |
| DNO               | Dry Nitrogen Oxide                                                | 0.0098–21.53  | 0.20   | 1.99   | 4.48                  |
| DPAN              | Dry Peroxyacetyl Nitrate                                          | 3.78–17.24    | 9.90   | 10.16  | 3.70                  |
| DHNO              | Dry Nitroxyl                                                      | 0.029–1.77    | 0.17   | 0.34   | 0.42                  |
| DRN <sub>3</sub>  | Dry Organic Nitrate                                               | 1.67–6.33     | 3.89   | 4.09   | 1.26                  |
| PNO <sub>3</sub>  | Dry Particle Nitrate                                              | 0.040–4.30    | 1.92   | 1.98   | 1.04                  |
| PNH <sub>4</sub>  | Dry Particle Ammonium                                             | 2.31–14.44    | 8.37   | 8.40   | 3.19                  |
| *WNO <sub>3</sub> | Wet Nitrate                                                       | 3.34–28.77    | 18.36  | 17.36  | 6.51                  |
| WNH <sub>4</sub>  | Wet Ammonium                                                      | 9.66–63.31    | 31.65  | 31.01  | 10.91                 |
| *TDS              | Total Deposited Sulphur                                           | 23.82–1182.20 | 53.55  | 72.75  | 95.21                 |
| DSO <sub>2</sub>  | Dry Sulphur Dioxide                                               | 1.71–391.85   | 7.75   | 18.41  | 42.12                 |
| PSO <sub>4</sub>  | Dry Particle Sulphate                                             | 2.32–15.34    | 6.23   | 6.58   | 2.31                  |
| HSO <sub>3</sub>  | Wet Hydrogen sulfite                                              | 3.94–844.44   | 13.62  | 22.42  | 54.84                 |
| *WSO <sub>4</sub> | Wet Sulphate                                                      | 11.41–57.67   | 24.79  | 25.34  | 6.58                  |

**Supplementary Materials SIII – iii.** List of all 27 bioclimatic variables and their associated summary statistics. Note that codes beginning in ‘bio’ are sourced from Bioclim data and codes beginning in ‘sg’ are sourced from Seedgrow data (McKenney *et al.*, 2006)

| CODE       | ENVIRONMENTAL VARIABLE                       | RANGE          | MEDIAN  | MEAN    | STANDARD DEVIATION |
|------------|----------------------------------------------|----------------|---------|---------|--------------------|
| *LATITUDE  | Latitude (°)                                 | 56.25–60.88    | 57.08   | 57.54   | 1.31               |
| *LONGITUDE | Longitude (°)                                | -113.74–108.89 | -110.45 | -110.68 | 1.20               |
| *ELEVATION | Elevation (m)                                | 231–622.52     | 460.34  | 425.50  | 108.37             |
| *bio_12    | Annual Precipitation (mm)                    | 359–483        | 451.50  | 441.87  | 31.95              |
| bio_13     | Precipitation of Wettest Period (mm)         | 14–22          | 20      | 19.35   | 2.25               |
| bio_14     | Precipitation of Driest Period (mm)          | 0              | 0       | 0       | 0                  |
| bio_15     | Precipitation of Seasonality (mm) (C of V)   | 46–62          | 55      | 54      | 3.94               |
| bio_16     | Precipitation of Wettest Quarter (mm)        | 149–226        | 209     | 201.5   | 20.68              |
| bio_17     | Precipitation of Driest Quarter (mm)         | 48–66          | 59.5    | 58.65   | 4.52               |
| bio_18     | Precipitation of Warmest Quarter (mm)        | 146–226        | 209     | 200.74  | 21.53              |
| bio_19     | Precipitation of Coldest Quarter (mm)        | 54–66          | 60      | 60.28   | 3.07               |
| *sg_01     | Julian day number at start of growing season | 115–136        | 123.5   | 124.33  | 6.20               |
| sg_02      | Julian day number at end of growing season   | 279–290        | 288     | 286.20  | 3.29               |
| sg_03      | Number of days of growing Season             | 144–176        | 165.5   | 162.87  | 9.32               |
| *sg_04     | Total Precipitation for period 1 (mm)        | 50–70.7        | 63.60   | 63.07   | 5.46               |
| sg_05      | Total precipitation for period 2 (mm)        | 49.30–76.3     | 64.4    | 63.34   | 7.48               |
| *sg_06     | Total precipitation for period 3 (mm)        | 209.40–324.1   | 304     | 293.27  | 31.26              |
| sg_07      | Total precipitation for period 4 (mm)        | 160–257.6      | 236.45  | 229.92  | 26.10              |
| sg_08      | Gdd above Base Temperature for Period 1      | 0–1            | 0       | 0.24    | 0.43               |
| *sg_09     | Gdd above Base Temperature for Period 2      | 194–245        | 219     | 218.06  | 14.17              |
| sg_10      | Gdd above Base Temperature for Period 3      | 942–1317       | 1150.5  | 1128.22 | 107.85             |
| sg_11      | Gdd above Base Temperature for Period 4      | 704–1113       | 930.5   | 910.15  | 117.48             |
| *sg_12     | Annual Mean Temperature (°C)                 | -2.8–1.64      | 0.44    | 0.026   | 1.28               |
| sg_13      | Annual Minimum Temperature (°C)              | -8.12–3.96     | -4.96   | -5.38   | 1.22               |
| sg_14      | Annual Maximum Temperature (°C)              | 2.52–7.23      | 5.70    | 5.43    | 1.34               |
| sg_15      | Mean Temperature for Period 3 (°C)           | 11.75–12.89    | 12.34   | 12.33   | 0.32               |
| sg_16      | Temperature Range for Period 3 (°C)          | 22.99–25.67    | 24.18   | 24.32   | 0.70               |

Range denotes the minimum and maximum, respectively. Variables denoted by \* refer to variables that were selected for gradient forest analysis following variable reduction methods.

**Supplementary Materials SIII – iv. Soil chemical variables (n = 40) of the 84 environmental variables initially analyzed.**

| CODE            | ENVIRONMENTAL VARIABLE                          | RANGE                          | MEDIAN                  | MEAN                    | STANDARD DEVIATION      |
|-----------------|-------------------------------------------------|--------------------------------|-------------------------|-------------------------|-------------------------|
| *pH             | pH – Soil                                       | 3.59–7.19                      | 4.46                    | 4.75                    | 0.96                    |
| *LOI            | Loss on Ignition – Soil                         | 0.40–41.72                     | 1.15                    | 2.78                    | 6.19                    |
| *X_Moisture     | % Moisture – Soil                               | 0.096–8.25                     | 0.38                    | 0.69                    | 1.28                    |
| *Bulk_Density   | Bulk Density – Soil                             | 0–1.64                         | 0                       | 0.58                    | 0.65                    |
| X_Porosity      | % Porosity – Soil                               | 0–64.47                        | 0                       | 23.82                   | 26.55                   |
| Bulk_Density_ff | Bulk Density Fine Fraction – Soil               | 0–1.80                         | 0                       | 0.61                    | 0.69                    |
| X_Porosity_ff   | % Porosity Fine Fraction – Soil                 | 0–57.97                        | 0                       | 22.46                   | 25.10                   |
| *N_NH4          | NH <sub>4</sub> N-Mineralization (µg/L) – Soil  | 0–11.65                        | 2.86                    | 4.09                    | 3.20                    |
| FI_H2O          | FI Water Extractions (mg/L) – Soil              | 0–8.76 × 10 <sup>-2</sup>      | 0                       | 8.78 × 10 <sup>-3</sup> | 1.94 × 10 <sup>-2</sup> |
| CI_H2O          | CI Water Extractions (mg/L) – Soil              | 0–0.35                         | 0                       | 4.65 × 10 <sup>-2</sup> | 7.90 × 10 <sup>-2</sup> |
| NO2_H2O         | NO <sub>2</sub> Water Extractions (mg/L) – Soil | 0–4.33 × 10 <sup>-2</sup>      | 0                       | 8.01 × 10 <sup>-3</sup> | 1.10 × 10 <sup>-2</sup> |
| NO3_H2O         | NO <sub>3</sub> Water Extractions (mg/L) – Soil | 0–0.60                         | 0                       | 1.80 × 10 <sup>-2</sup> | 8.78 × 10 <sup>-2</sup> |
| *PO4_H2O        | PO <sub>4</sub> Water Extractions (mg/L) – Soil | 0–0.46                         | 0                       | 3.81 × 10 <sup>-2</sup> | 8.64 × 10 <sup>-2</sup> |
| SO4_H2O         | SO <sub>4</sub> Water Extractions (mg/L) – Soil | 0–1.08                         | 0                       | 0.13                    | 0.24                    |
| X_Clay          | Particle Size Analysis- % Clay – Soil           | 0.26–8.94                      | 1.01                    | 2.26                    | 2.06                    |
| X_Silt          | Particle Size Analysis- % Silt – Soil           | 2.10–73.23                     | 11.11                   | 24.64                   | 22.64                   |
| X_Sand          | Particle Size Analysis- % Sand – Soil           | 20.78–97.64                    | 87.04                   | 72.97                   | 24.42                   |
| X_Pebbles       | Particle Size Analysis- % Pebbles – Soil        | 0–2.02                         | 0                       | 0.14                    | 0.47                    |
| *Al_EC          | Al Exchangeable Cations (mg/L) – Soil           | 0.03–2.43                      | 0.23                    | 0.44                    | 0.48                    |
| Ca_EC           | Ca Exchangeable Cations (mg/L) – Soil           | 0.28–54.81                     | 1.06                    | 5.22                    | 12.44                   |
| *Fe_EC          | Fe Exchangeable Cations (mg/L) – Soil           | -8.80 × 10 <sup>-2</sup> –0.39 | 4.12 × 10 <sup>-2</sup> | 8.23 × 10 <sup>-2</sup> | 0.12                    |
| Mg_EC           | Mg Exchangeable Cations (mg/L) – Soil           | -1.09 × 10 <sup>-3</sup> –4.22 | 6.52 × 10 <sup>-2</sup> | 0.31                    | 0.75                    |
| *Mn_EC          | Mn Exchangeable Cations (mg/L) – Soil           | 1.90 × 10 <sup>-2</sup> –0.54  | 0.15                    | 0.17                    | 0.12                    |
| *Na_EC          | Na Exchangeable Cations (mg/L) – Soil           | 3.00 × 10 <sup>-2</sup> –0.70  | 0.10                    | 0.14                    | 0.12                    |
| K_EC            | K Exchangeable Cations (mg/L) – Soil            | 5.00 × 10 <sup>-2</sup> –0.75  | 0.19                    | 0.24                    | 0.18                    |
| *X.N            | CNS - % Nitrogen – Soil                         | 5.33 × 10 <sup>-3</sup> –0.10  | 1.77 × 10 <sup>-2</sup> | 2.49 × 10 <sup>-2</sup> | 2.19 × 10 <sup>-2</sup> |
| X.C             | CNS - % Carbon – Soil                           | 0.21–3.50                      | 0.48                    | 0.65                    | 0.61                    |
| *X.S            | CNS - % Sulphur – Soil                          | 0–2.0 × 10 <sup>-2</sup>       | 2.81 × 10 <sup>-3</sup> | 3.84 × 10 <sup>-3</sup> | 4.28 × 10 <sup>-3</sup> |
| *C/N_Ratio      | Carbon to Nitrogen Ratio – Soil                 | 16.9–43.40                     | 26.32                   | 27.32                   | 5.82                    |
| *pH_LFH         | pH – LFH                                        | 3.02–7.01                      | 3.96                    | 4.23                    | 0.90                    |
| *FI_LFH_H2O     | FI Water Extractions (mg/L) – LFH               | 0–0.98                         | 0.14                    | 0.20                    | 0.21                    |
| *CI_LFH_H2O     | CI Water Extractions (mg/L) – LFH               | 0–10.32                        | 0.79                    | 1.34                    | 1.80                    |
| *NO2_LFH_H2O    | NO <sub>2</sub> Water Extractions (mg/L) – LFH  | 0–3.86 × 10 <sup>-2</sup>      | 1.05 × 10 <sup>-2</sup> | 1.27 × 10 <sup>-2</sup> | 1.04 × 10 <sup>-2</sup> |
| *NO3_LFH_H2O    | NO <sub>3</sub> Water Extractions (mg/L) – LFH  | 0–0.30                         | 7.11 × 10 <sup>-2</sup> | 7.67 × 10 <sup>-2</sup> | 6.71 × 10 <sup>-2</sup> |
| *PO4_LFH_H2O    | PO <sub>4</sub> Water Extractions (mg/L) – LFH  | 0–11.52                        | 4.36                    | 4.22                    | 3.84                    |
| SO4_LFH_H2O     | SO <sub>4</sub> Water Extractions (mg/L) – LFH  | 0–14.70                        | 1.88                    | 4.22                    | 4.41                    |
| *X.N_LFH        | CNS - % Nitrogen – LFH                          | 0–1.48                         | 0.99                    | 0.95                    | 0.28                    |
| X.C_LFH         | CNS - % Carbon – LFH                            | 0–48.64                        | 38.49                   | 36.44                   | 9.84                    |
| *X.S_LFH        | CNS - % Sulphur – LFH                           | 0–0.22                         | 6.37 × 10 <sup>-2</sup> | 7.76 × 10 <sup>-2</sup> | 4.25 × 10 <sup>-2</sup> |
| *C/N_Ratio_LFH  | Carbon to Nitrogen Ratio – LFH                  | 0–59.91                        | 38.17                   | 37.21                   | 10.31                   |

X. Represents %. Range denotes the minimum and maximum, respectively. Variables denoted by \* refer to variables that were selected for gradient forest analysis following variable reduction methods.



**Supplementary Materials SIII – v.** Ordination plot for Principal Component Analysis of climate variables, using the RDA function in vegan. Dots represent study sites.

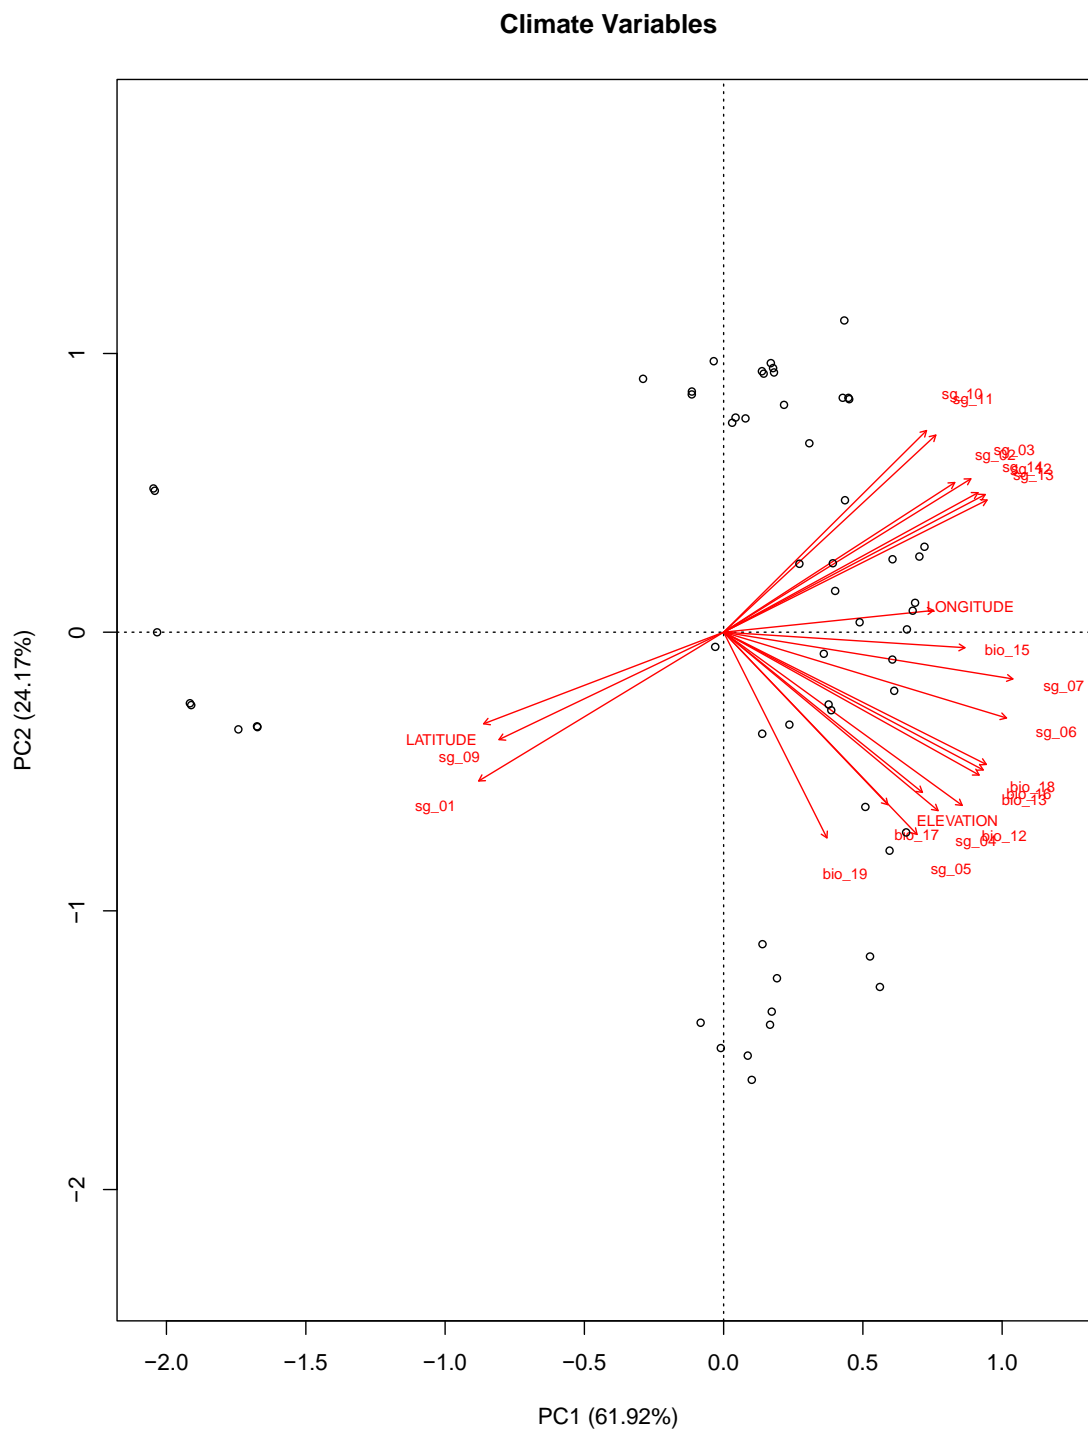

**Supplementary Materials SIII – vi.** Ordination plot for Principal Component Analysis of deposition variables, using the RDA function in vegan R package. Dots represent study sites.

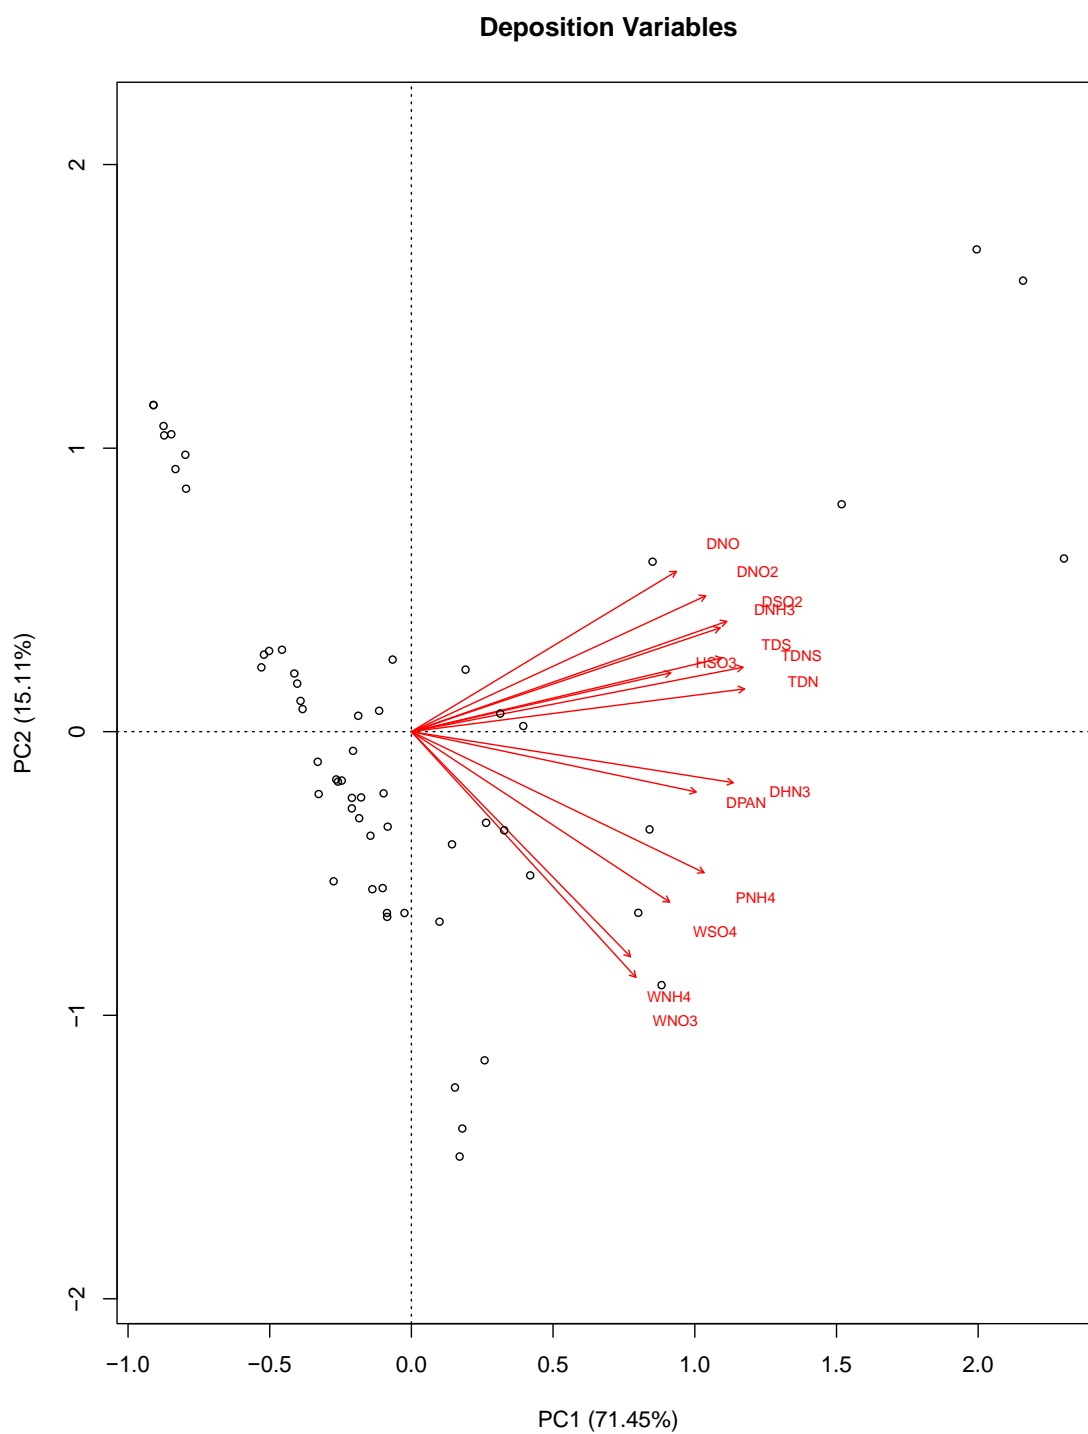

**Supplementary Materials SIII – vii.** Ordination plot for Principal Component Analysis of soil chemical variables, using the RDA function in vegan R package. Dots represent study sites.

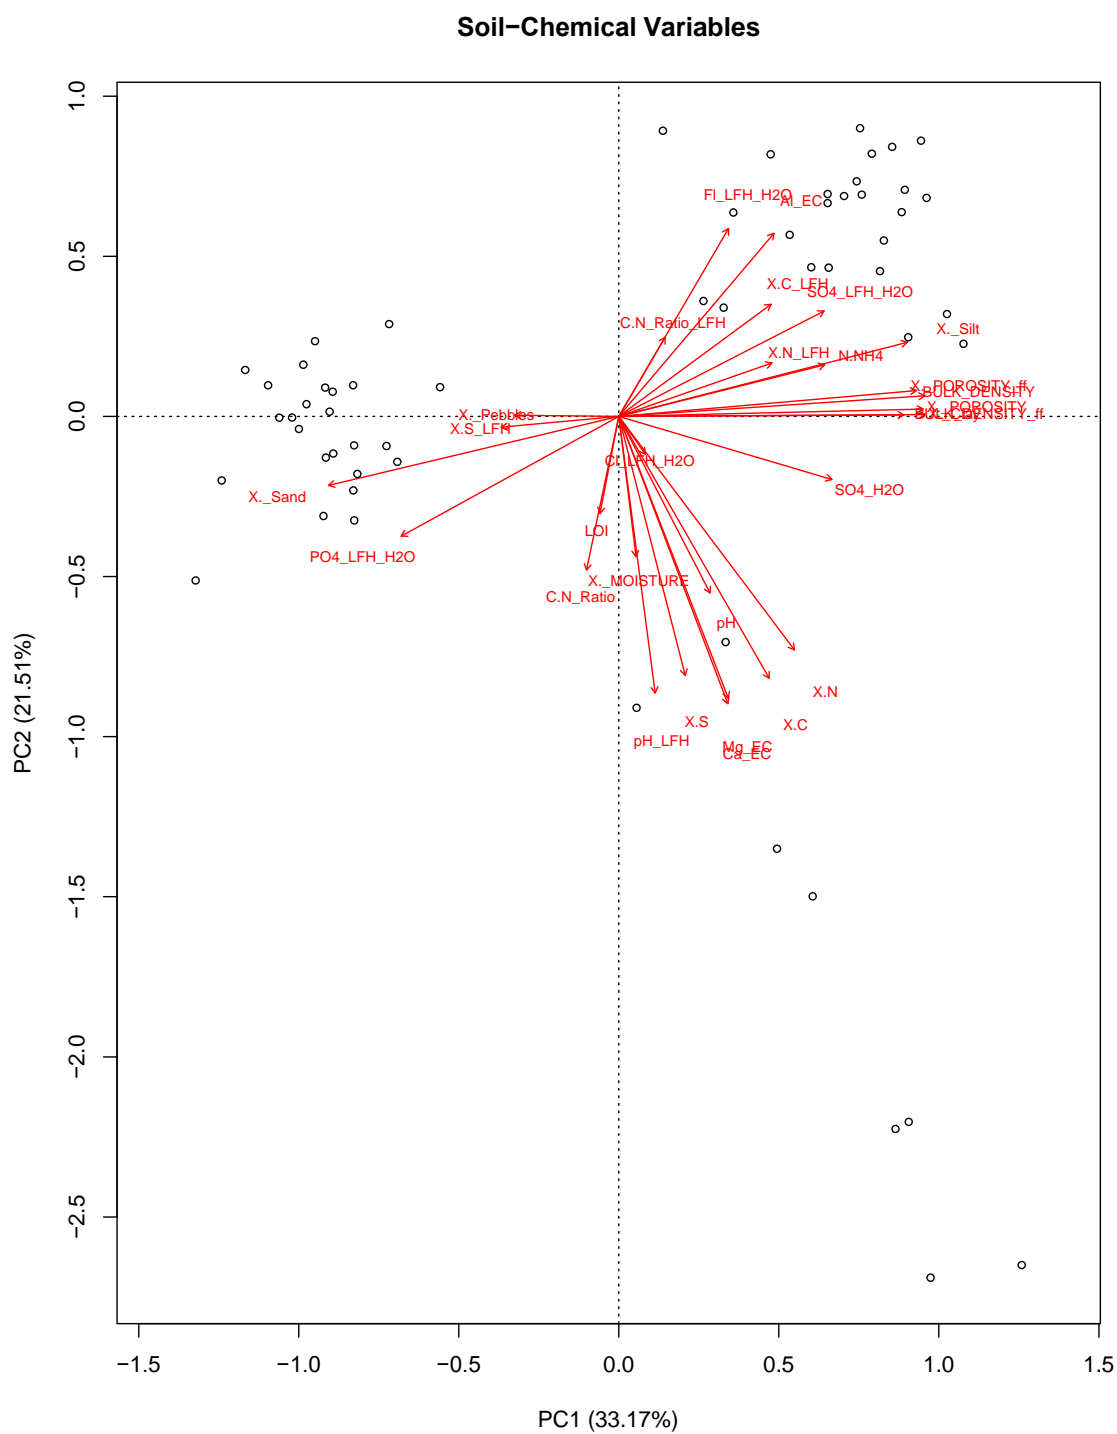

**Supplementary Materials SIII – viii.** Variation partitioning venn diagram for climate, deposition and soil-chemical variables and their joint-effects ( $p < 0.001$ ). The joint-effect value between deposition and soil-chemical variables was -3.84 and is not show.

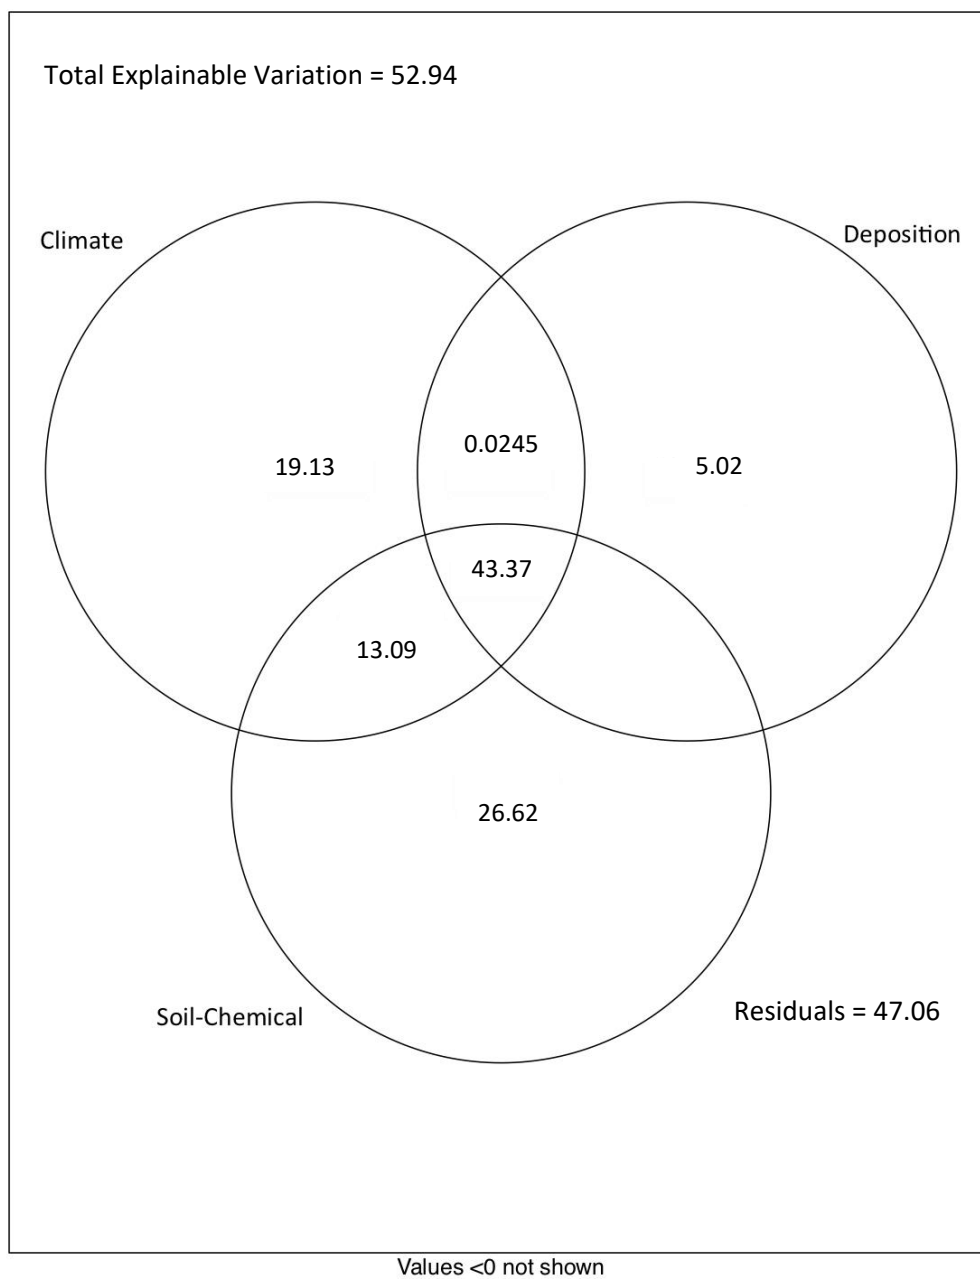

**Supplementary Materials SIII – ix. GradientForest density plots for all remaining 35 environmental variables.**

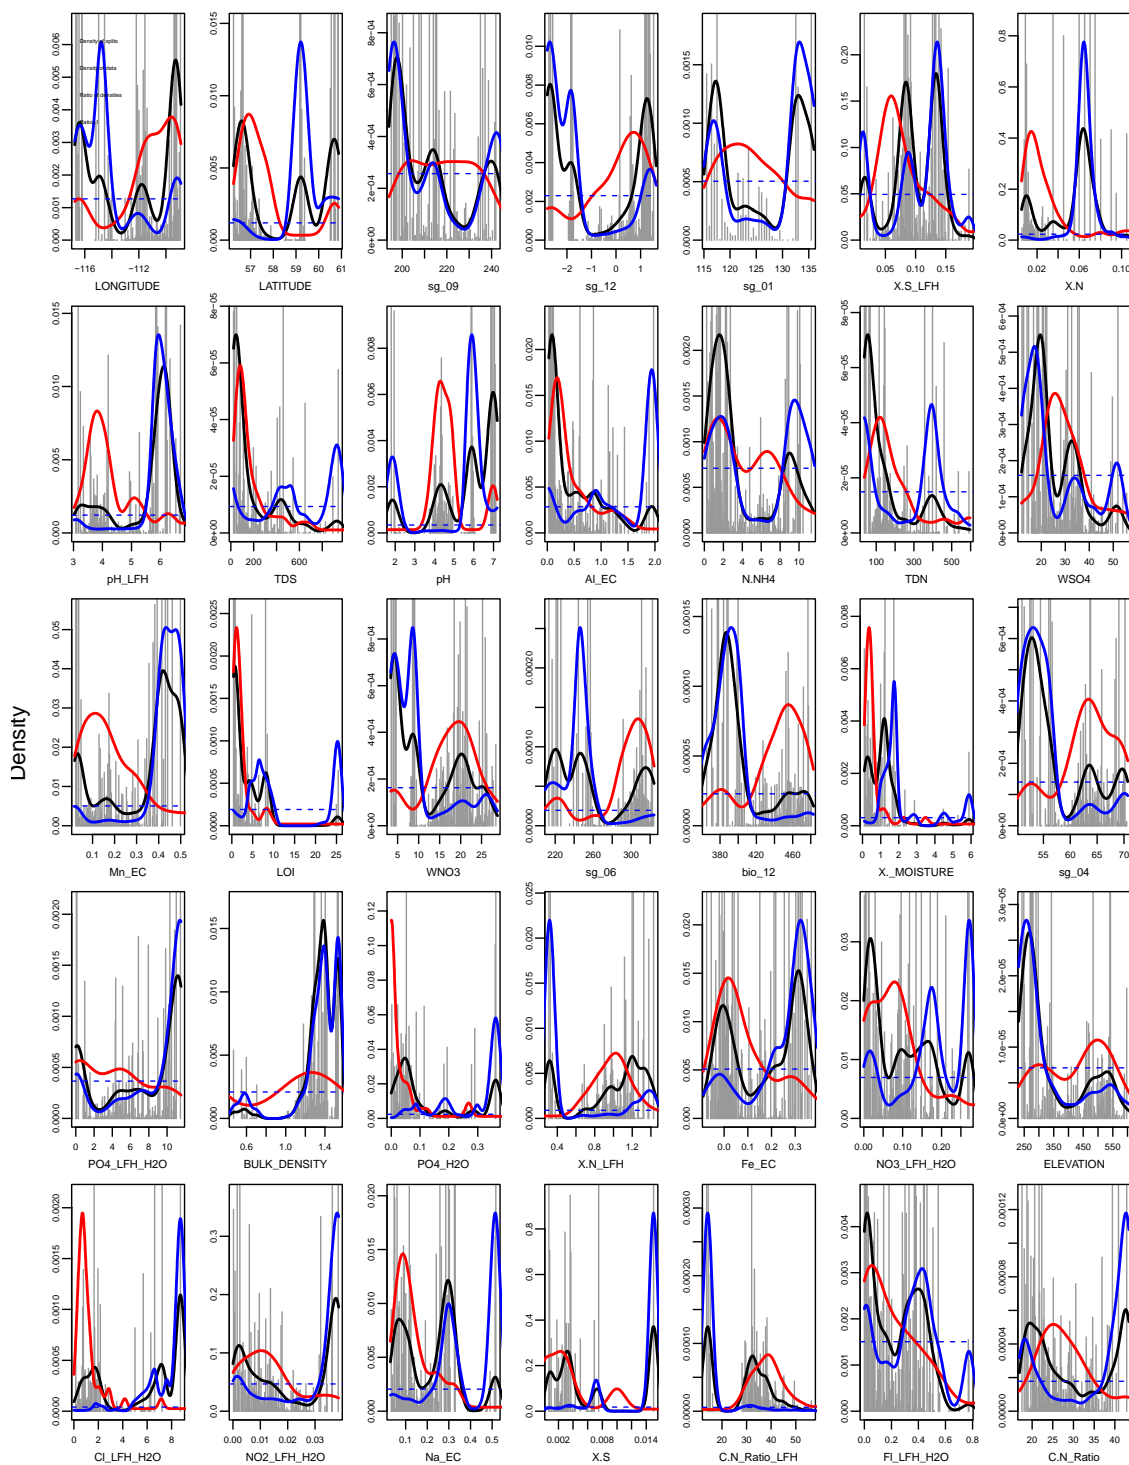

**Supplementary Materials SIII – x.** GradientForest species cumulative importance plots for all remaining 35 environmental variables. Only the top five responding species are displayed for each predictor.

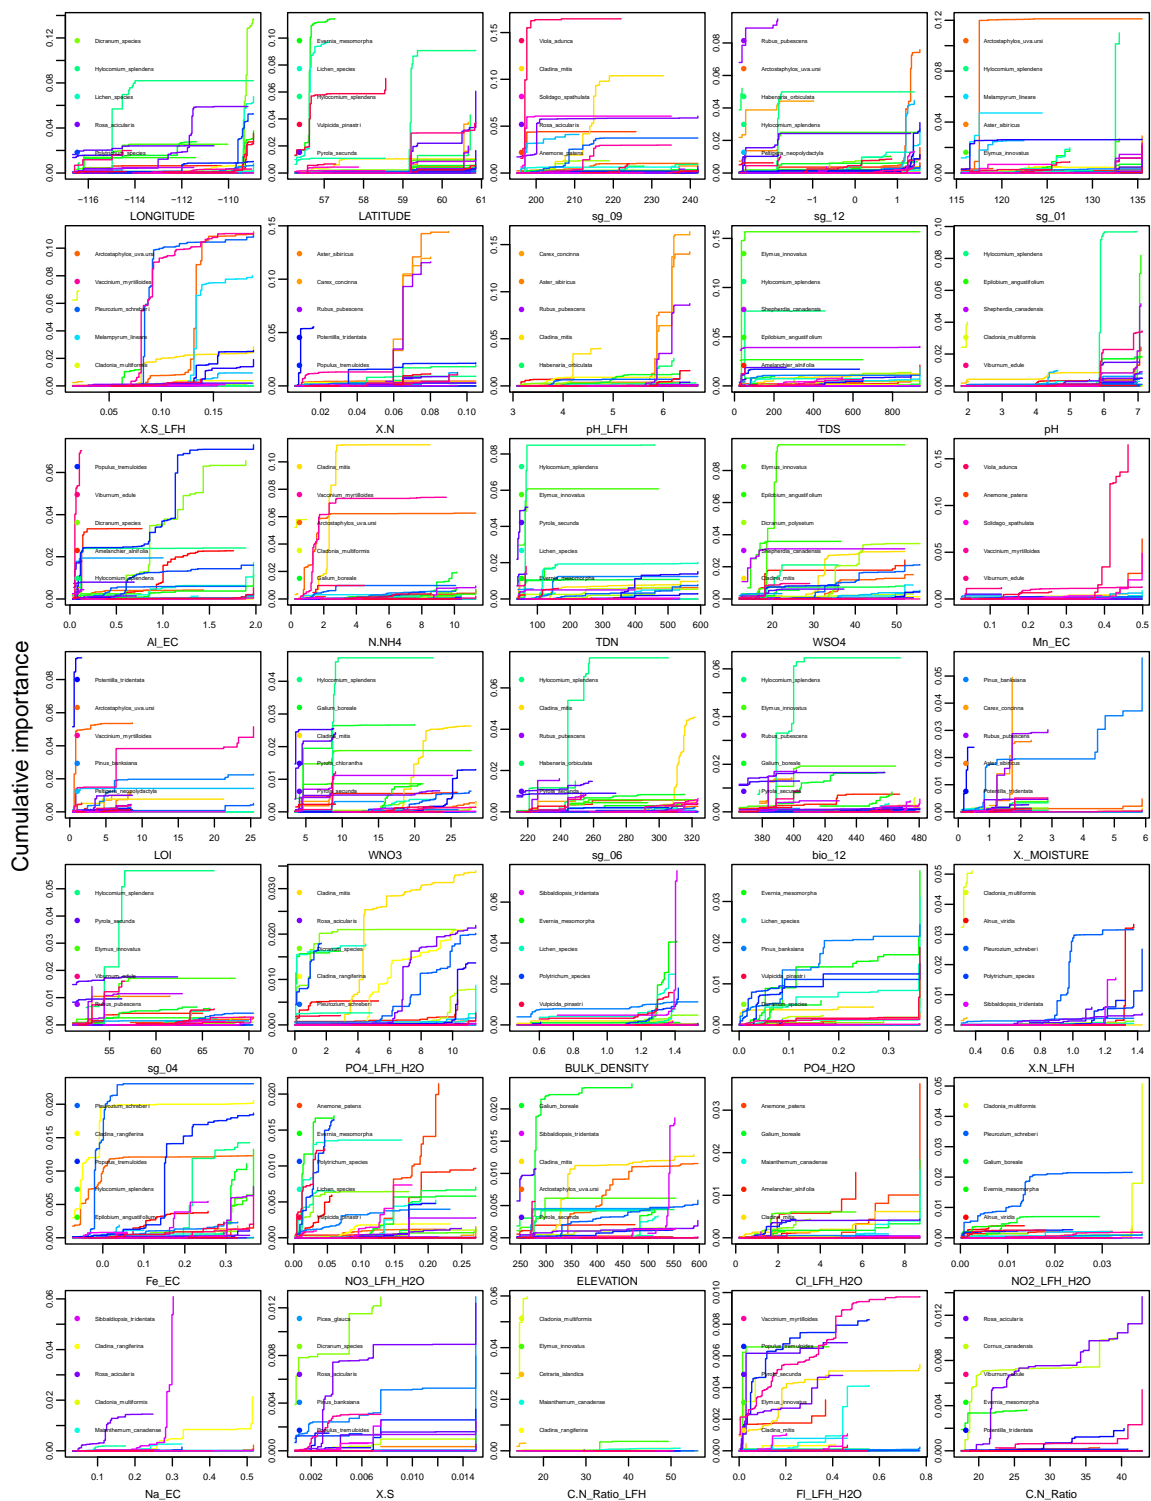

**Supplementary Materials SIII – xi.** GradientForest community cumulative importance plots for all remaining 35 environmental variables.

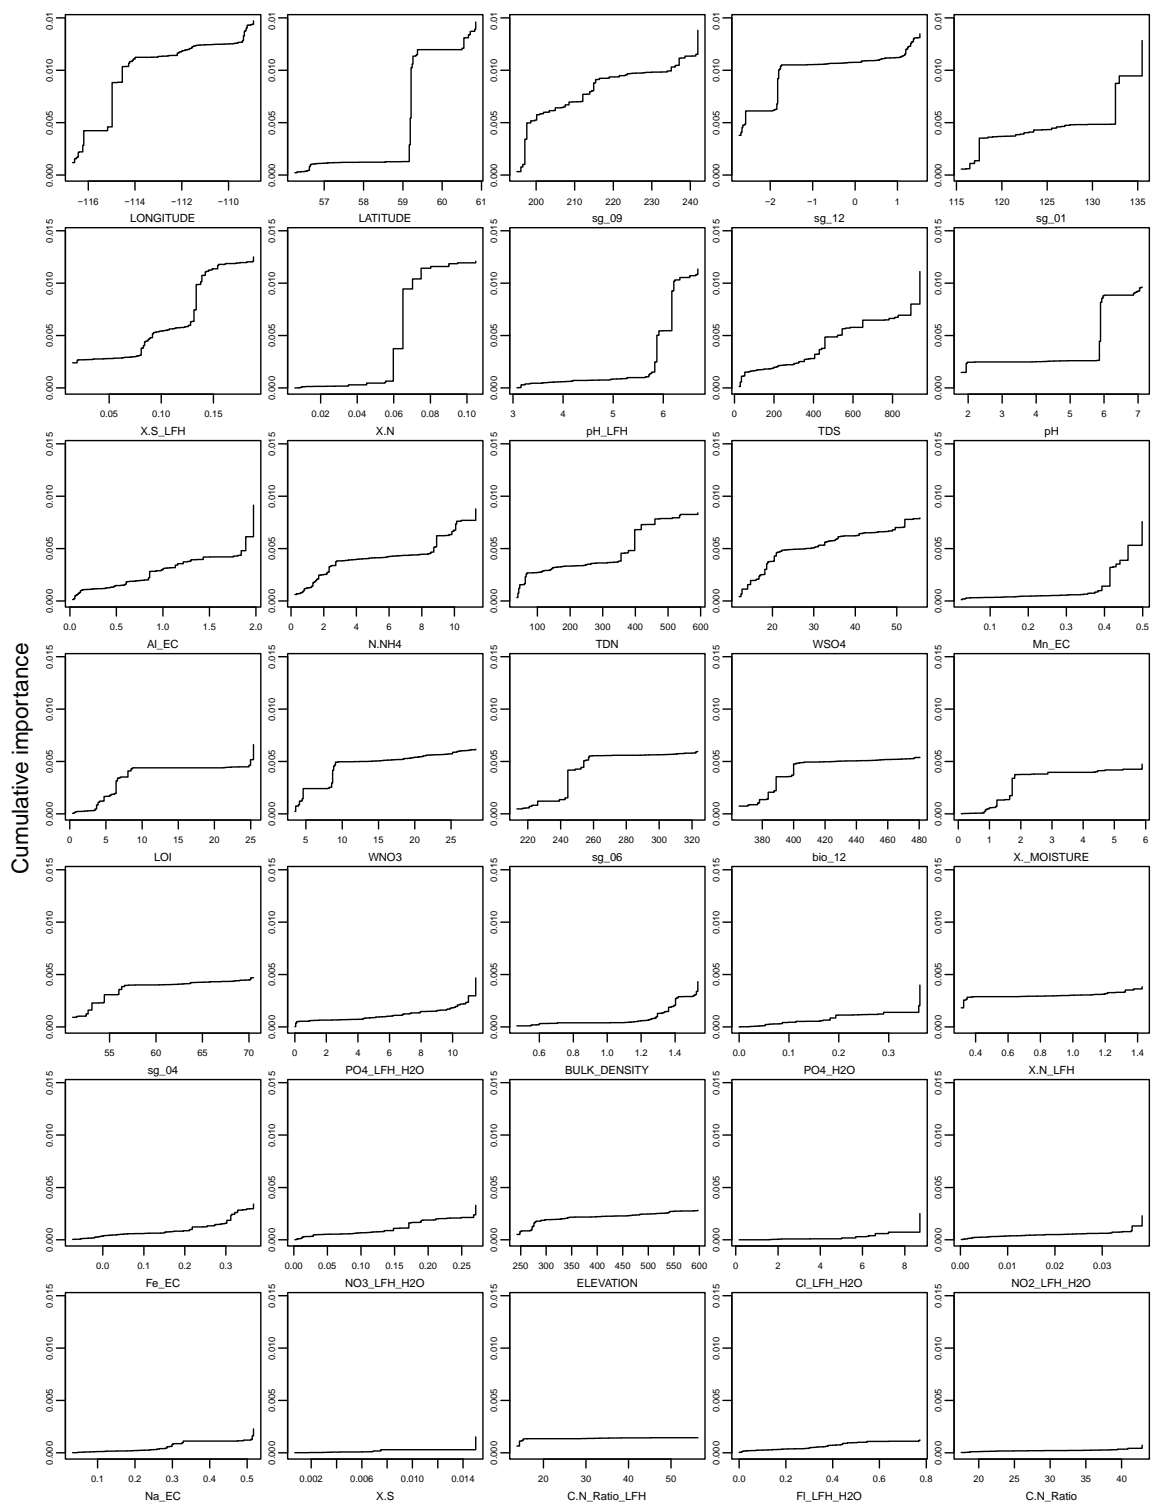

**Supplementary Materials SIII – xii.** Correlations between biodiversity indices and all 35 variables selected for further analysis in gradientForest. Variables are divided into their 3 respective categories, Climate, Deposition and Soil-Chemical variables. \*\*\* p < 0.001, \*\*p < 0.01, \* p < 0.05

| Environmental Variable                | Variable Category     | Pearson's Correlation Coefficient (r) |            |           |
|---------------------------------------|-----------------------|---------------------------------------|------------|-----------|
|                                       |                       | Species Richness                      | Shannon    | Simpson   |
| Latitude                              | Climate               | 0.087                                 | 0.480 ***  | 0.369 *   |
| Longitude                             | Climate               | -0.458 **                             | -0.327 *   | -0.230    |
| Elevation                             | Climate               | -0.276                                | -0.287     | -0.210    |
| Bio_12                                | Climate               | -0.315 *                              | -0.436 **  | -0.318 *  |
| Sg_01                                 | Climate               | -0.199                                | 0.478 ***  | 0.378 **  |
| Sg_04                                 | Climate               | -0.353 *                              | -0.349 *   | -0.220    |
| Sg_06                                 | Climate               | -0.197                                | -0.532 *** | -0.412 ** |
| Sg_09                                 | Climate               | -0.390 **                             | 0.413 **   | 0.306 *   |
| Sg_12                                 | Climate               | 0.107                                 | -0.506 *** | -0.405 ** |
| TDS                                   | Deposition            | 0.405 **                              | -0.157     | -0.083    |
| WSO <sub>4</sub>                      | Deposition            | 0.284                                 | -0.407 **  | -0.298 *  |
| TDN                                   | Deposition            | 0.290                                 | -0.216     | -0.144    |
| WNO <sub>3</sub>                      | Deposition            | 0.096                                 | -0.503 *** | -0.395 ** |
| pH                                    | Soil physico-chemical | -0.056                                | 0.185      | 0.077     |
| LOI                                   | Soil physico-chemical | 0.112                                 | -0.017     | -0.087    |
| X_Moisture                            | Soil physico-chemical | 0.126                                 | 0.047      | -0.013    |
| Bulk_Density                          | Soil physico-chemical | -0.169                                | 0.608 ***  | 0.557 *** |
| N.NH <sub>4</sub>                     | Soil physico-chemical | -0.222                                | 0.486 ***  | 0.420 **  |
| PO <sub>4</sub> _H <sub>2</sub> O     | Soil physico-chemical | 0.042                                 | 0.345 *    | 0.285     |
| Al_EC                                 | Soil physico-chemical | -0.127                                | 0.245      | 0.268     |
| Fe_EC                                 | Soil physico-chemical | 0.095                                 | 0.669 ***  | 0.551 *** |
| Mn_EC                                 | Soil physico-chemical | 0.197                                 | -0.362 *   | -0.356 *  |
| Na_EC                                 | Soil physico-chemical | 0.028                                 | 0.040      | 0.047     |
| X.N                                   | Soil physico-chemical | 0.268                                 | 0.514 ***  | 0.423 **  |
| X.S                                   | Soil physico-chemical | 0.405 **                              | 0.459 **   | 0.305 *   |
| C.N_Ratio                             | Soil physico-chemical | -0.006                                | -0.016     | 0.014     |
| pH_LFH                                | Soil physico-chemical | 0.106                                 | 0.205      | 0.093     |
| FI_LFH_H <sub>2</sub> O               | Soil physico-chemical | -0.297 *                              | -0.006     | 0.079     |
| Cl_LFH_H <sub>2</sub> O               | Soil physico-chemical | 0.379 **                              | 0.180      | 0.152     |
| NO <sub>2</sub> _LFH_H <sub>2</sub> O | Soil physico-chemical | 0.038                                 | -0.330 *   | -0.382 ** |
| NO <sub>3</sub> _LFH_H <sub>2</sub> O | Soil physico-chemical | 0.335 *                               | 0.122      | 0.065     |
| PO <sub>4</sub> _LFH_H <sub>2</sub> O | Soil physico-chemical | 0.510 ***                             | -0.215     | -0.205    |
| X.N_LFH                               | Soil physico-chemical | 0.0075                                | 0.295 *    | 0.297 *   |
| X.S_LFH                               | Soil physico-chemical | 0.340 *                               | -0.086     | 0.020     |
| C.N_Ratio_LFH                         | Soil physico-chemical | -0.252                                | -0.054     | 0.039     |
